# Supplementary material for: Sodium Alginate/Sodium Lignosulfonate Composite Gel Beads for Controlled Release of (+)-Pinoresinol: Synthesis, Characterization, and Applications
Source: Research Square preprint supplement (doi:10.21203/rs.3.rs-6495115/v1), 2025-06-06
Supplement: Supplementary file 1 [file 3f9b9ad4e62fbf06058d8625.docx]

**Sodium Alginate/Sodium Lignosulfonate Composite Gel Beads for Controlled Release of (+)-Pinoresinol: Synthesis, Characterization, and Applications**

Yuhao Cheng, Junjie Zhang, Xun Li, Chaoqun You, Fei Wang, Yu Zhang*

Jiangsu Co-Innovation Center of Efficient Processing and Utilization of Forest Resources, Jiangsu Provincial Key Lab for the Chemistry and Utilization of Agro Forest Biomass, College of Chemical Engineering, Nanjing Forestry University, Nanjing 210037, PR China

*Corresponding author：Yu Zhang

Tel: +86-25-85427635. Fax: +86-25-85418873. E-mail: yuzhang@njfu.edu.cn


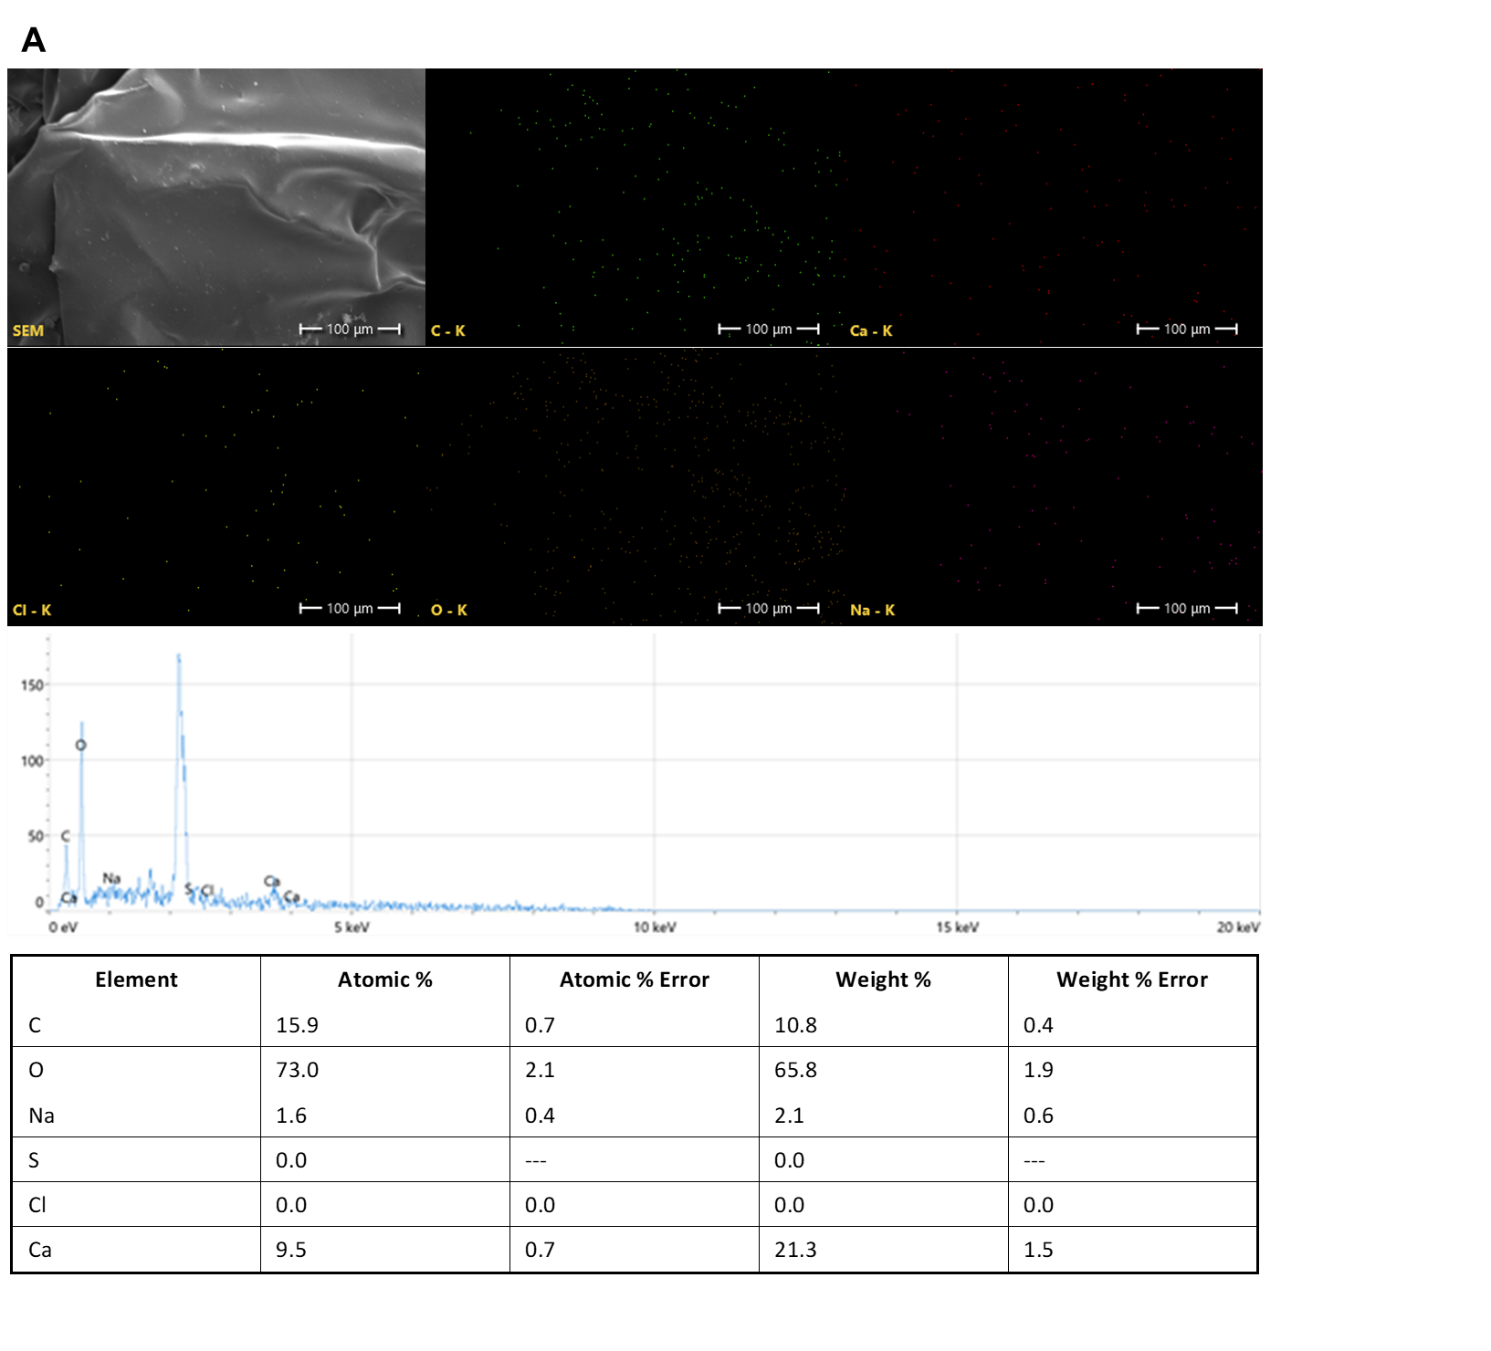


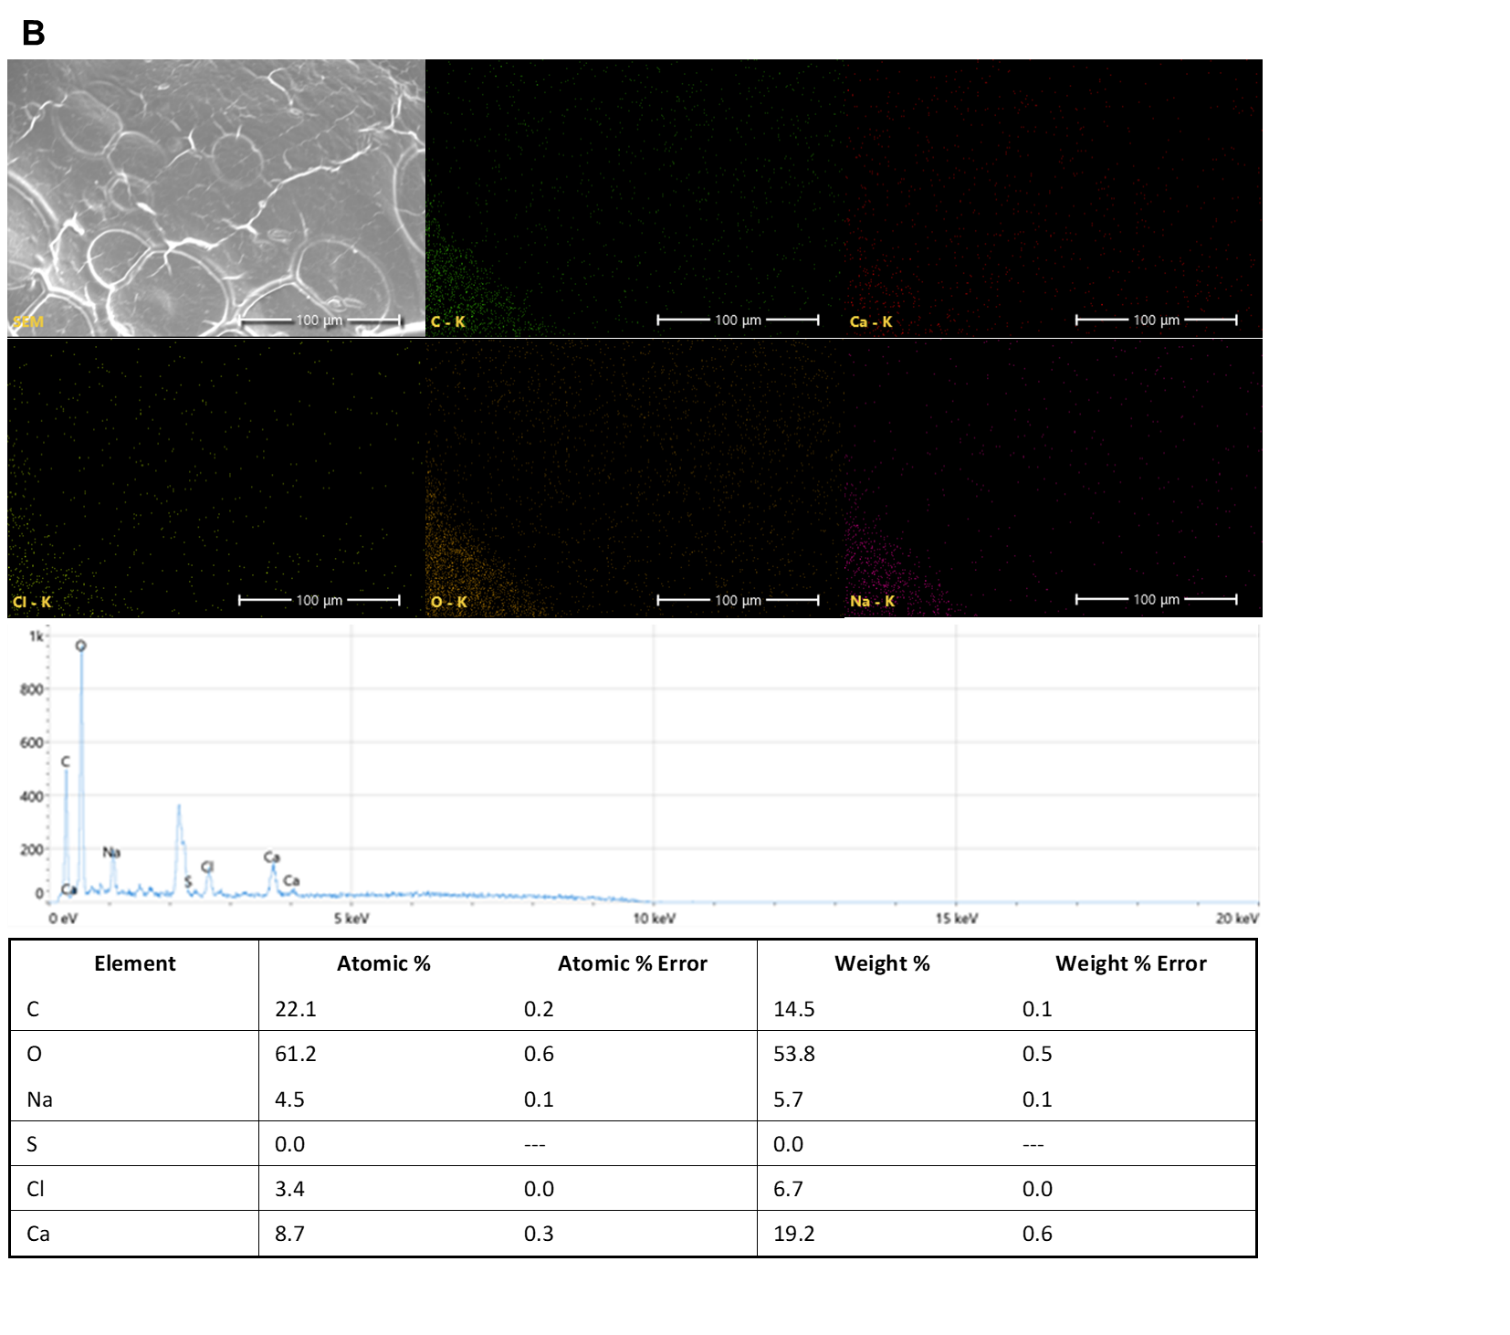


Fig. S1. Gel Bead Surface Elemental Distribution (EDS). A. SA/LS@PIN, B. LS@PIN.

Tab. S1. SA/LS@PIN drug-carrying capacity

| Formulations | Drug loading(%) | Encapsulation efficiency (%) |
| --- | --- | --- |
| 1% LS | 0.53 | 53.1 |
| 2% LS | 0.61 | 61.1 |
| 3% LS | 0.86 | 85.5 |

Tab. S2. Mechanical properties of SA/LS@PIN gel beads

| Sample | Mechanical properties | |
| --- | --- | --- |
| break force（g） | Break strain（%） |
| SA@PIN | 193.63 ± 3.01 | 56.01 ± 0.41 |
| SA/LS@PIN | 248.33 ± 6.26 | 67.67 ± 1.15 |
